# Supplementary material for: Durable Expansion of TCR-δ Meta-Clonotypes After BCG Revaccination in Humans
Source: PubMed Central journal article supplement (PMC9005636; doi:10.3389/fimmu.2022.834757), 2022-03-30

**a.**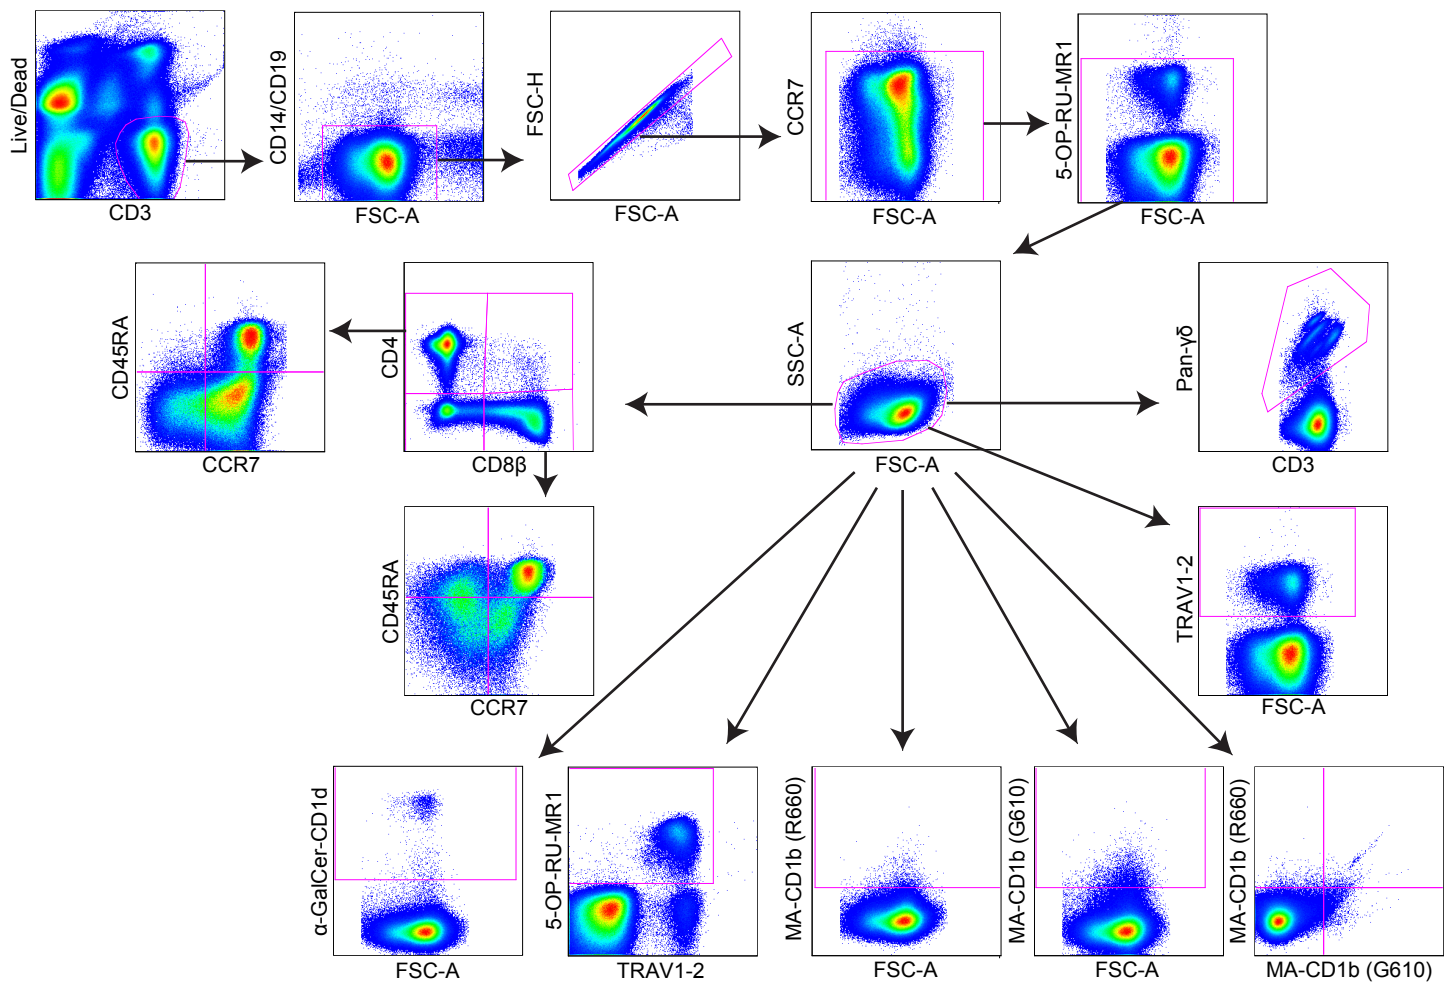**b.**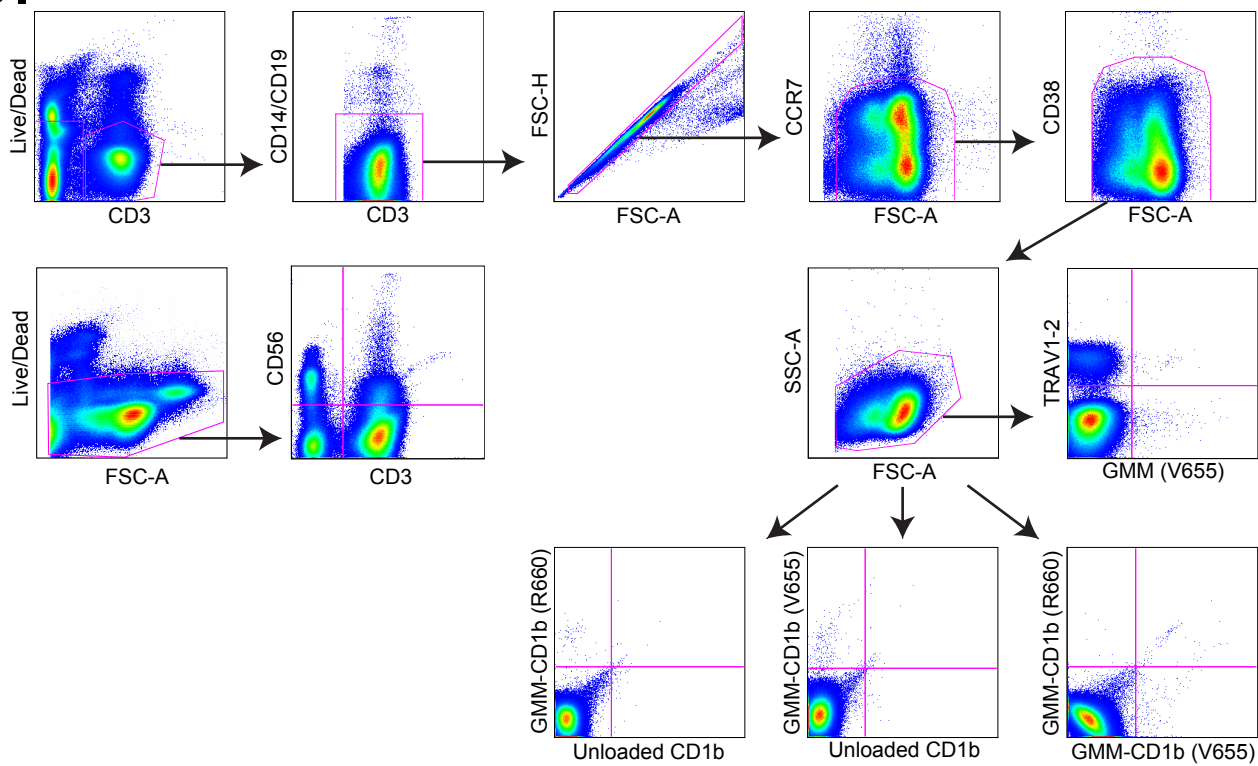

Supplement: Image_1.pdf [file Image_1.pdf]
