# Supplementary material for: Durable Expansion of TCR-δ Meta-Clonotypes After BCG Revaccination in Humans
Source: PubMed Central journal article supplement (PMC9005636; doi:10.3389/fimmu.2022.834757), 2022-03-30

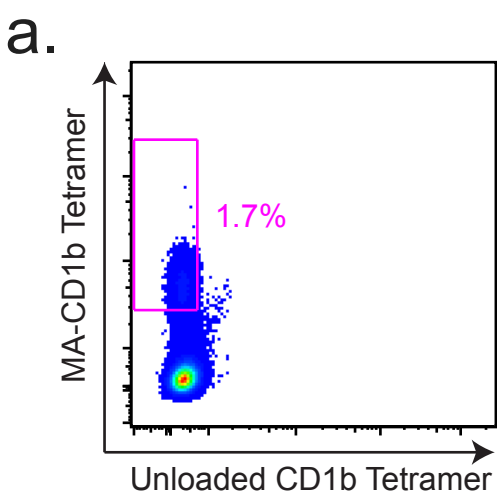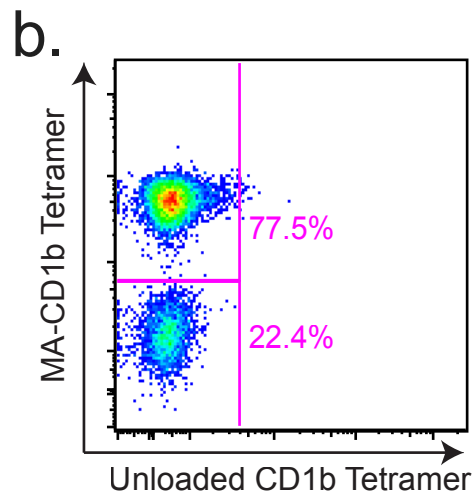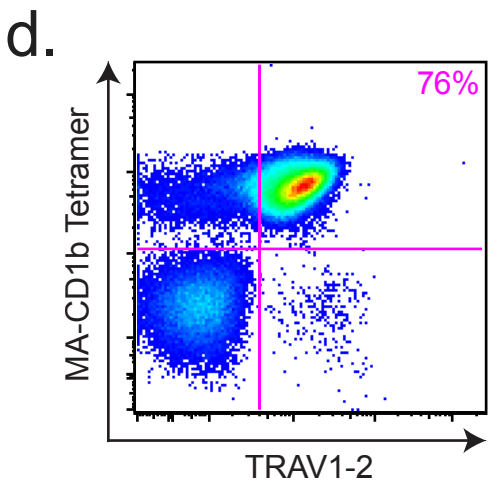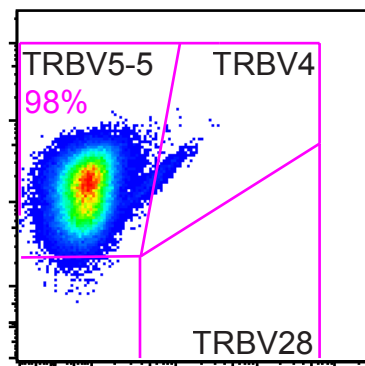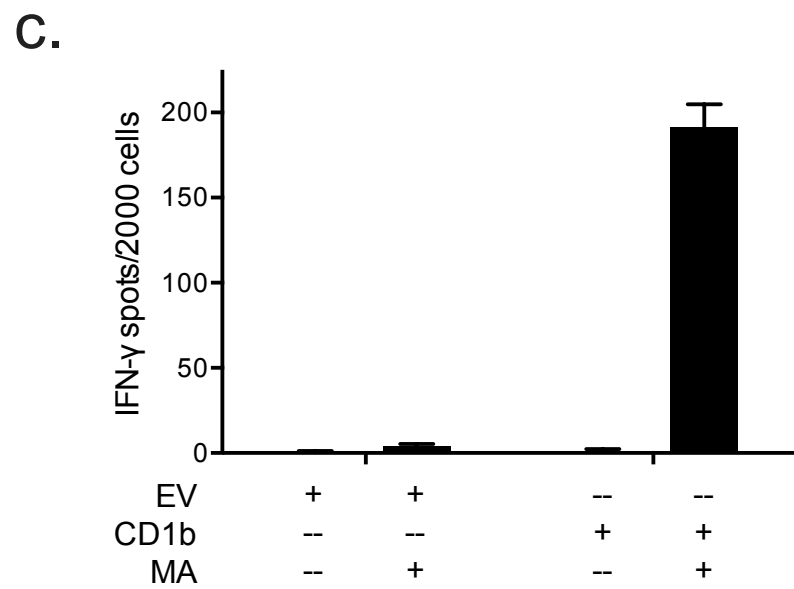

Supplement: Image_2.pdf [file Image_2.pdf]
