# Supplementary material for: Durable Expansion of TCR-δ Meta-Clonotypes After BCG Revaccination in Humans
Source: PubMed Central journal article supplement (PMC9005636; doi:10.3389/fimmu.2022.834757), 2022-03-30

### CDR3 Hydrophobicity

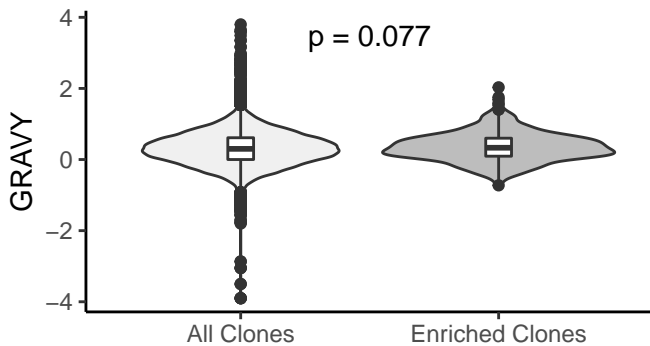

### CDR3 Basic Residues

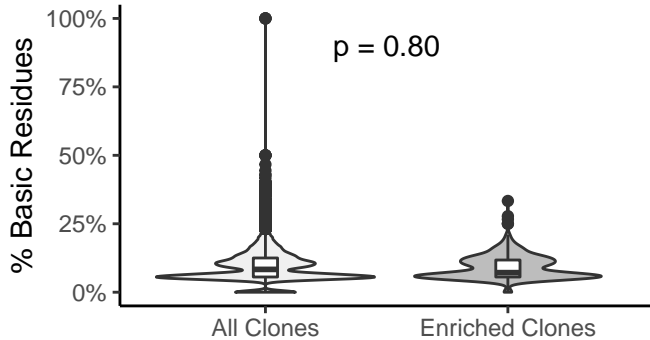

### CDR3 Aliphatic Residues

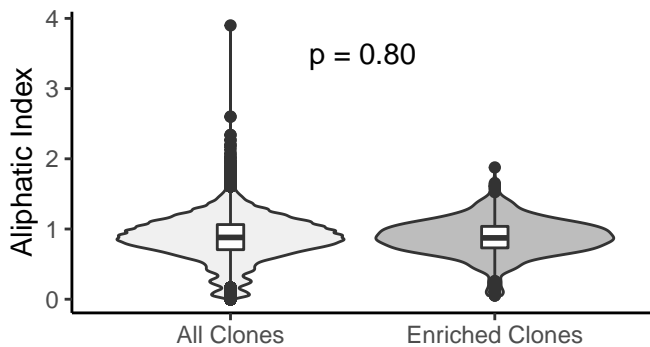

### CDR3 Aromatic Residues

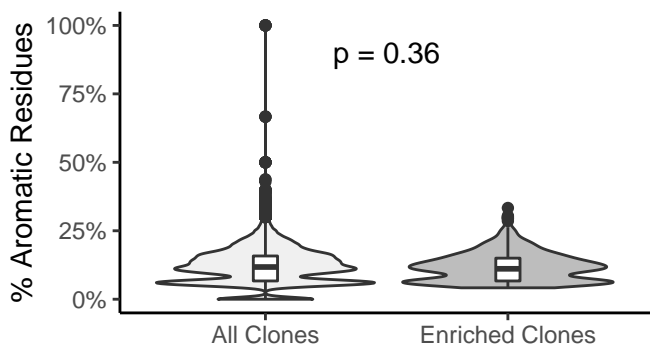

### CDR3 Polarity

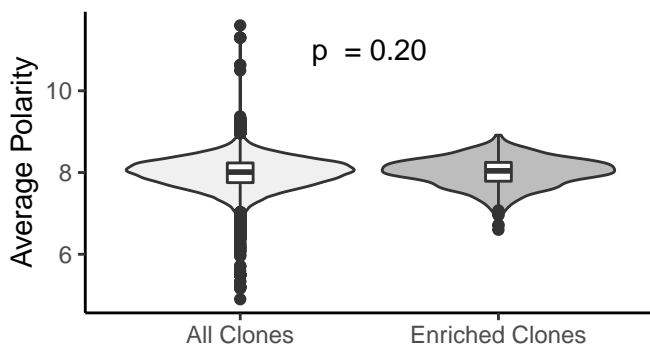

Supplement: Image_3.pdf [file Image_3.pdf]
