# Supplementary material for: Durable Expansion of TCR-δ Meta-Clonotypes After BCG Revaccination in Humans
Source: PubMed Central journal article supplement (PMC9005636; doi:10.3389/fimmu.2022.834757), 2022-03-30
Supplement: Table_1.pdf [file Table_1.pdf]

**Supplemental Table 1. Participant Demographic Information**

| Participant ID | Age (Years) | Sex | TST (mm) | BMI (kg/m <sup>2</sup> ) | Flow Cytometry |         |          | ImmunoSEQ |         |          |
|----------------|-------------|-----|----------|--------------------------|----------------|---------|----------|-----------|---------|----------|
|                |             |     |          |                          | 0 weeks        | 3 weeks | 52 weeks | 0 weeks   | 3 weeks | 52 weeks |
| 0023           | 37          | F   | 24       | 26.9                     | X              | X       | X        | X         | X       | X        |
| 0033           | 24          | M   | 25       | 22.2                     | X              | X       | X        | X         | X       | X        |
| 0048           | 25          | F   | 23       | 37.6                     | X              | X       | X        | X         | X       | X        |
| 0052           | 24          | M   | 17       | 21.9                     | X              | X       | X        | X         | X       | X        |
| 0071           | 20          | M   | 23       | 22.1                     | X              | X       | X        | X         | X       | X        |
| 0086           | 19          | F   | 15       | 18.4                     | X              | X       | X        | X         | X       |          |
| 0093           | 27          | F   | 18       | 27.0                     | X              | X       | X        | X         | X       | X        |
| 0096           | 26          | F   | 21       | 34.4                     | X              | X       | X        | X         | X       | X        |
| 0109           | 23          | M   | 19       | 18.0                     | X              | X       | X        | X         | X       | X        |
| 0122           | 38          | F   | 29       | 36.5                     | X              | X       | X        | X         | X       | X        |
| 0131           | 39          | F   | 16       | 40.9                     | X              | X       | X        | X         | X       | X        |
| 0155           | 24          | F   | 15       | 27.2                     | X              | X       | X        | X         | X       | X        |
| 0159           | 19          | F   | 19       | 23.9                     | X              | X       | X        | X         | X       | X        |
| 0164           | 19          | F   | 18       | 24.3                     | X              | X       | X        |           |         | X        |
| 0173           | 21          | F   | 19       | 17.6                     | X              | X       | X        | X         | X       | X        |
| 0189           | 25          | M   | 22       | 21.8                     | X              | X       | X        | X         | X       | X        |
| 0224           | 22          | M   | 23       | 18.1                     | X              | X       | X        | X         | X       | X        |
| 0228           | 20          | F   | 27       | 26.3                     | X              | X       | X        | X         | X       | X        |
| 0238           | 20          | F   | 26       | 29.9                     | X              | X       | X        | X         | X       | X        |
| 0241           | 22          | M   | 16       | 18.9                     | X              | X       | X        | X         | X       | X        |

**Supplemental Table 1. Summary of samples used for *ex vivo* analysis of DURT cells following BCG revaccination.** Samples used in this study are listed by participant identifier (ID) and were derived from a clinical trial designed to determine safety and immunogenicity of BCG revaccination in South African adults with latent TB (Hatherill et al., 2014). Age reflects the age at last birthday at the time the sample was collected. Sex is self-reported. TST induration at study enrolment is reported in millimetres (mm). Body mass index (BMI) was calculated from height (cm) and weight (kg) obtained from physical examination during office visit. The Flow Cytometry and ImmunoSEQ columns summarize which assays were performed on each sample. A blank cell indicates that no sample was included from this time point.
