# Supplementary material for: Durable Expansion of TCR-δ Meta-Clonotypes After BCG Revaccination in Humans
Source: PubMed Central journal article supplement (PMC9005636; doi:10.3389/fimmu.2022.834757), 2022-03-30
Supplement: Table_2.pdf [file Table_2.pdf]

**Supplemental Table 2. Flow Cytometry panels.**

**Flow Panel 1**

| Fluorophore         | Detector | Specificity | Antibody Clone | Manufacturer (Catalogue #) | Purpose             |
|---------------------|----------|-------------|----------------|----------------------------|---------------------|
| BB700               | B710     | CD8 $\beta$ | 2ST8.5H7       | BD Biosciences (745761)    | Lineage             |
| FITC                | B515     | Live/Dead   | -              | Life Technologies (L23101) | Viability           |
| PE-Cy7              | G780     | CD45RA      | HI100          | BioLegend (304125)         | Memory              |
| ECD                 | G610     | CD3         | UCHT1          | Beckman Coulter (IM2705U)  | Lineage             |
| PE                  | G575     | Mock-CD1b   | -              | Life Technologies (SA1017) | Exclusion           |
| APC-AI $\alpha$ 750 | R780     | CD4         | 13B8.2         | Beckman Coulter (A94685)   | Lineage             |
| AI $\alpha$ 700     | R710     | CD56        | HCD56          | BioLegend (318316)         | Lineage             |
| APC                 | R660     | GMM-CD1b    | -              | Life Technologies (S868)   | Antigen-specificity |
| BV780               | V780     | CD14 & CD19 | M5E2 & SJ25C1  | BioLegend (301840, 363028) | Exclusion           |
| BV711               | V710     | CCR7        | 150503         | BD Biosciences (566602)    | Memory              |
| BV650               | V655     | GMM-CD1b    | -              | BioLegend (405232)         | Antigen-specificity |
| BV605               | V610     | HLA-DR      | G46-6          | BD Biosciences (562845)    | Activation          |
| BV510               | V510     | TRAV1-2     | 3C10           | BioLegend (351717)         | TCR Identification  |
| BV421               | V450     | CD38        | HIT2           | BD Biosciences (562444)    | Activation          |

**Flow Panel 2**

| Fluorophore         | Detector | Specificity         | Antibody Clone | Manufacturer (Catalogue #)    | Purpose             |
|---------------------|----------|---------------------|----------------|-------------------------------|---------------------|
| BB700               | B710     | CD8 $\beta$         | 2ST8.5H7       | BD Biosciences (745761)       | Lineage             |
| FITC                | B515     | Live/Dead           | -              | Life Technologies (L23101)    | Viability           |
| PE-Vio770           | G780     | Pan- $\gamma\delta$ | 11F2           | Miltenyi Biotec (130-113-505) | TCR identification  |
| ECD                 | G610     | MA-CD1b             | -              | Life Technologies (SA1017)    | Antigen-specificity |
| PE                  | G575     | PBS57-CD1d          | -              | Life Technologies (SA1017)    | Antigen-specificity |
| APC-AI $\alpha$ 750 | R780     | CD4                 | 13B8.2         | Beckman Coulter (A94685)      | Lineage             |
| APC                 | R660     | MA-CD1b             | -              | Life Technologies (S868)      | Antigen-specificity |
| BV780               | V780     | CD14 & CD19         | M5E2 & SJ25C1  | BioLegend (301840, 363028)    | Exclusion           |
| BV711               | V710     | CCR7                | 150503         | BD Biosciences (566602)       | Memory              |
| BV605               | V610     | TRAV1-2             | 3C10           | BioLegend (351720)            | TCR Identification  |
| BV510               | V510     | Mock-CD1b           | -              | BioLegend (405234)            | Antigen-specificity |
| BV421               | V450     | 5-OP-RU-MR1         | -              | BioLegend (405225)            | Antigen-specificity |
| BUV737              | U730     | CD45RA              | HI100          | BD Biosciences (564442)       | Memory              |
| BUV395              | U395     | CD3                 | UCHT1          | BD Biosciences (563546)       | Lineage             |
